# Supplementary material for: CNS distribution, signalling properties and central effects of G-protein coupled receptor 4
Source: PubMed Central journal article supplement (PMC6063991; doi:10.1016/j.neuropharm.2018.06.007), 2018-08

**Supplementary table 1. Statistical analysis of different experimental conditions related to Figure 2C.**

| Tukey's multiple comparisons test | Summary | Adjusted P Value |
|-----------------------------------|---------|------------------|
| -8.0 vs. -7.7                     | ns      | 0.8988           |
| -8.0 vs. -7.4                     | ns      | 0.9162           |
| -8.0 vs. -7.1                     | ****    | <0.0001          |
| -8.0 vs. -6.8                     | ****    | <0.0001          |
| -7.7 vs. -7.4                     | ns      | 0.4177           |
| -7.7 vs. -7.1                     | ****    | <0.0001          |
| -7.7 vs. -6.8                     | ****    | <0.0001          |
| -7.4 vs. -7.1                     | ****    | <0.0001          |
| -7.4 vs. -6.8                     | ****    | <0.0001          |
| -7.1 vs. -6.8                     | ns      | 0.9926           |

**Supplementary table 2. Statistical analysis of different experimental conditions related to Figure 3A**

| Tukey's multiple comparisons test | Summary | Adjusted P Value |
|-----------------------------------|---------|------------------|
| -8.0 vs. -7.7                     | ***     | 0.0007           |
| -8.0 vs. -7.4                     | ns      | 0.9998           |
| -8.0 vs. -7.1                     | ns      | 0.1379           |
| -8.0 vs. -6.8                     | ****    | <0.0001          |
| -7.7 vs. -7.4                     | **      | 0.0012           |
| -7.7 vs. -7.1                     | ****    | <0.0001          |
| -7.7 vs. -6.8                     | ****    | <0.0001          |
| -7.4 vs. -7.1                     | ns      | 0.0948           |
| -7.4 vs. -6.8                     | ****    | <0.0001          |
| -7.1 vs. -6.8                     | ***     | 0.0006           |

**Supplementary table 3. Statistical analysis of different experimental conditions related to Figure 4A.**

| Dunnett's multiple comparisons test | Summary | Adjusted P Value |
|-------------------------------------|---------|------------------|
| <b>-8.0</b>                         |         |                  |
| control vs. 100µM LL                | ns      | 0.8724           |
| control vs. 1mM LL                  | ns      | 0.9281           |
| control vs. 10mM LL                 | ns      | 0.3477           |
|                                     |         |                  |
| <b>-7.7</b>                         |         |                  |
| control vs. 100µM LL                | ns      | 0.9957           |
| control vs. 1mM LL                  | ns      | 0.1477           |
| control vs. 10mM LL                 | ***     | 0.0002           |
|                                     |         |                  |
| <b>-7.4</b>                         |         |                  |
| control vs. 100µM LL                | ns      | 0.5618           |
| control vs. 1mM LL                  | *       | 0.0342           |
| control vs. 10mM LL                 | ****    | 0.0001           |
|                                     |         |                  |
| <b>-7.1</b>                         |         |                  |
| control vs. 100µM LL                | ns      | 0.8677           |
| control vs. 1mM LL                  | **      | 0.0097           |
| control vs. 10mM LL                 | ****    | 0.0001           |
|                                     |         |                  |
| <b>-6.8</b>                         |         |                  |
| control vs. 100µM LL                | ns      | 0.9999           |
| control vs. 1mM LL                  | *       | 0.0358           |
| control vs. 10mM LL                 | ****    | 0.0001           |

**Supplementary table 4. Statistical analysis of different experimental conditions related to Figure 4B.**

| Dunnett's multiple comparisons test | Summary | Adjusted P Value |
|-------------------------------------|---------|------------------|
| <b>-8.0</b>                         |         |                  |
| control vs. 100 $\mu$ M LL          | ns      | 0.5452           |
| control vs. 1mM LL                  | ns      | 0.9999           |
| control vs. 10mM LL                 | ns      | 0.4036           |
|                                     |         |                  |
| <b>-7.7</b>                         |         |                  |
| control vs. 100 $\mu$ M LL          | ns      | 0.993            |
| control vs. 1mM LL                  | ns      | 0.7017           |
| control vs. 10mM LL                 | ns      | 0.8196           |
|                                     |         |                  |
| <b>-7.4</b>                         |         |                  |
| control vs. 100 $\mu$ M LL          | ns      | 0.8586           |
| control vs. 1mM LL                  | ns      | 0.9763           |
| control vs. 10mM LL                 | ns      | 0.4896           |
|                                     |         |                  |
| <b>-7.1</b>                         |         |                  |
| control vs. 100 $\mu$ M LL          | ns      | 0.9627           |
| control vs. 1mM LL                  | *       | 0.0103           |
| control vs. 10mM LL                 | ***     | 0.0001           |
|                                     |         |                  |
| <b>-6.8</b>                         |         |                  |
| control vs. 100 $\mu$ M LL          | ns      | 0.5947           |
| control vs. 1mM LL                  | ns      | 0.1132           |
| control vs. 10mM LL                 | ****    | 0.0001           |

**Supplementary Figure 1. NE 52-QQ57 has no effect on cardiovascular variables and neurovascular coupling in anaesthetised rats.**

**A.** Peripheral application of NE 52-QQ57 does not affect the arterial blood pressure and heart rate.

Increasing doses of NE 52-QQ57 were injected i.p.; dose is shown as cumulative. two-way ANOVA revealed no significant differences between baseline and any other point.

**B.** Cortical CBF and BOLD responses to somatosensory stimulation are not affected by administration of NE 52-QQ57 (20mg/kg).

Top – pseudo-coloured images of BOLD signals evoked by sensory stimulation before and after systemic administration of NE 52-QQ57.

Bottom - dynamics of CBF and BOLD responses before and after administration of NE 52-QQ57.

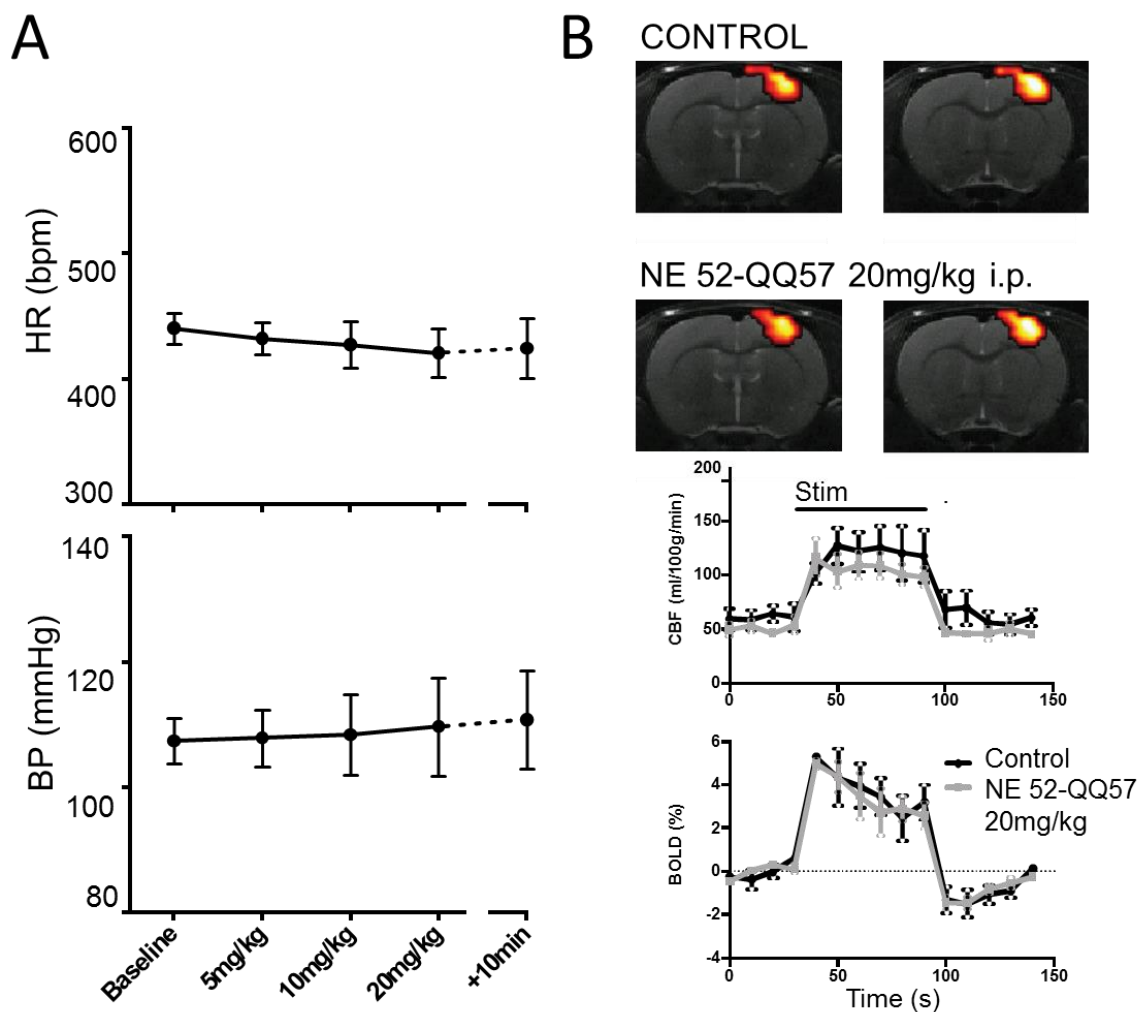

**Supplementary Figure 2. GPR4 expression in a mouse brain as measured by fluorescent *in situ* hybridisation** in A: blood vessel (magnified from the main Figure 1J), scale bar 10 $\mu$ m; B: retrotrapezoid nucleus (magnified from the main Figure 1Q), scale bar 50 $\mu$ m; C: locus coeruleus (magnified from the main Figure 1N), scale bar 50  $\mu$ m. Green arrows indicate vessels.

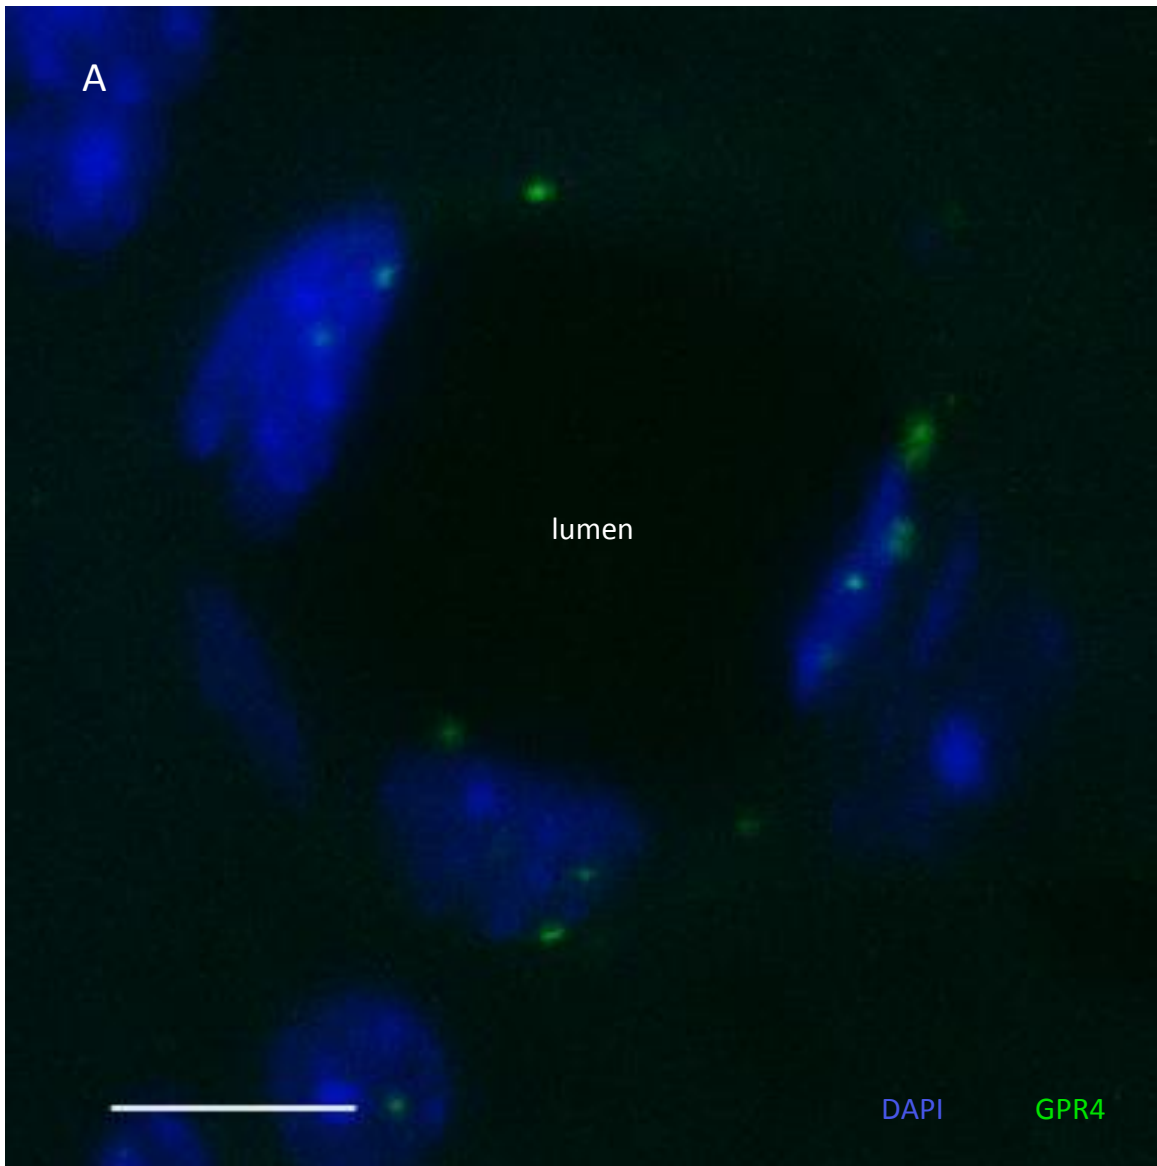

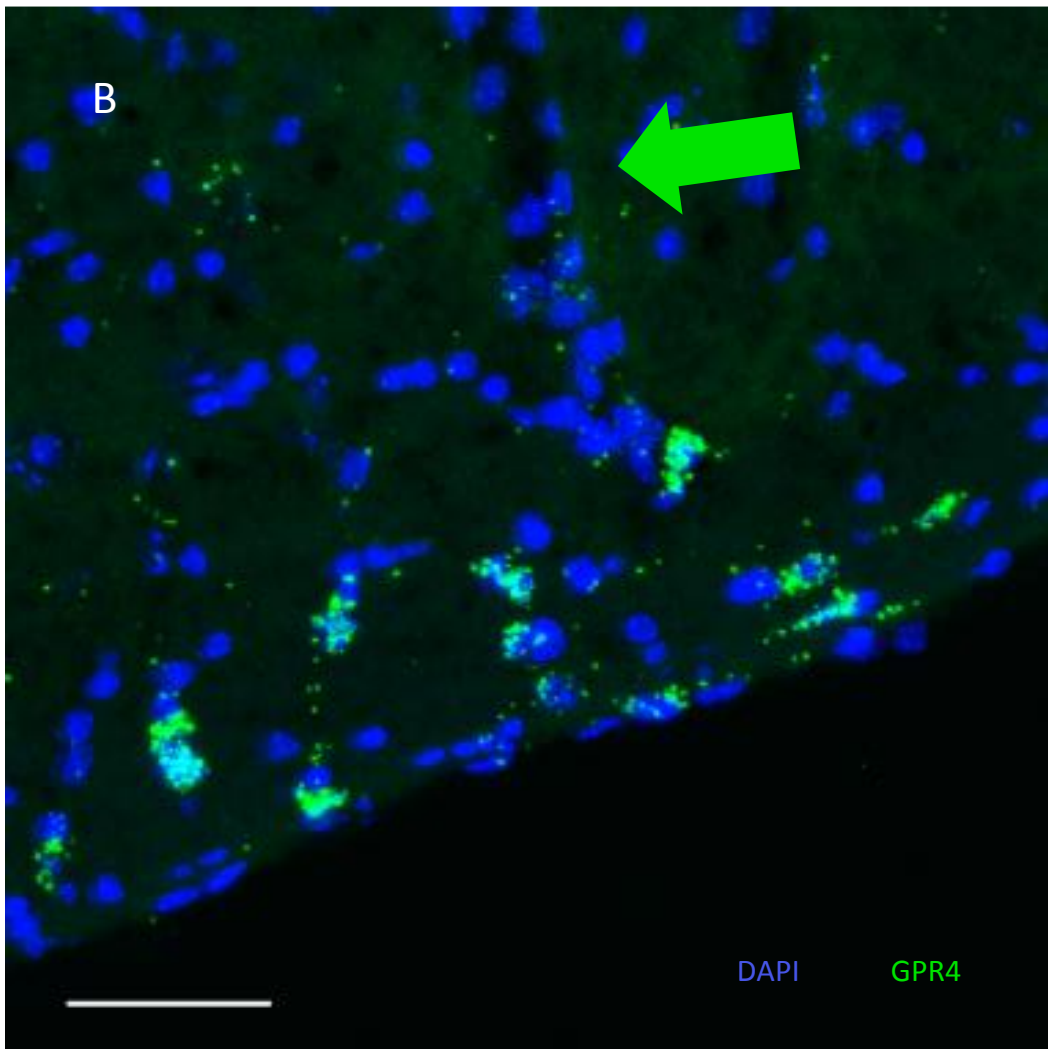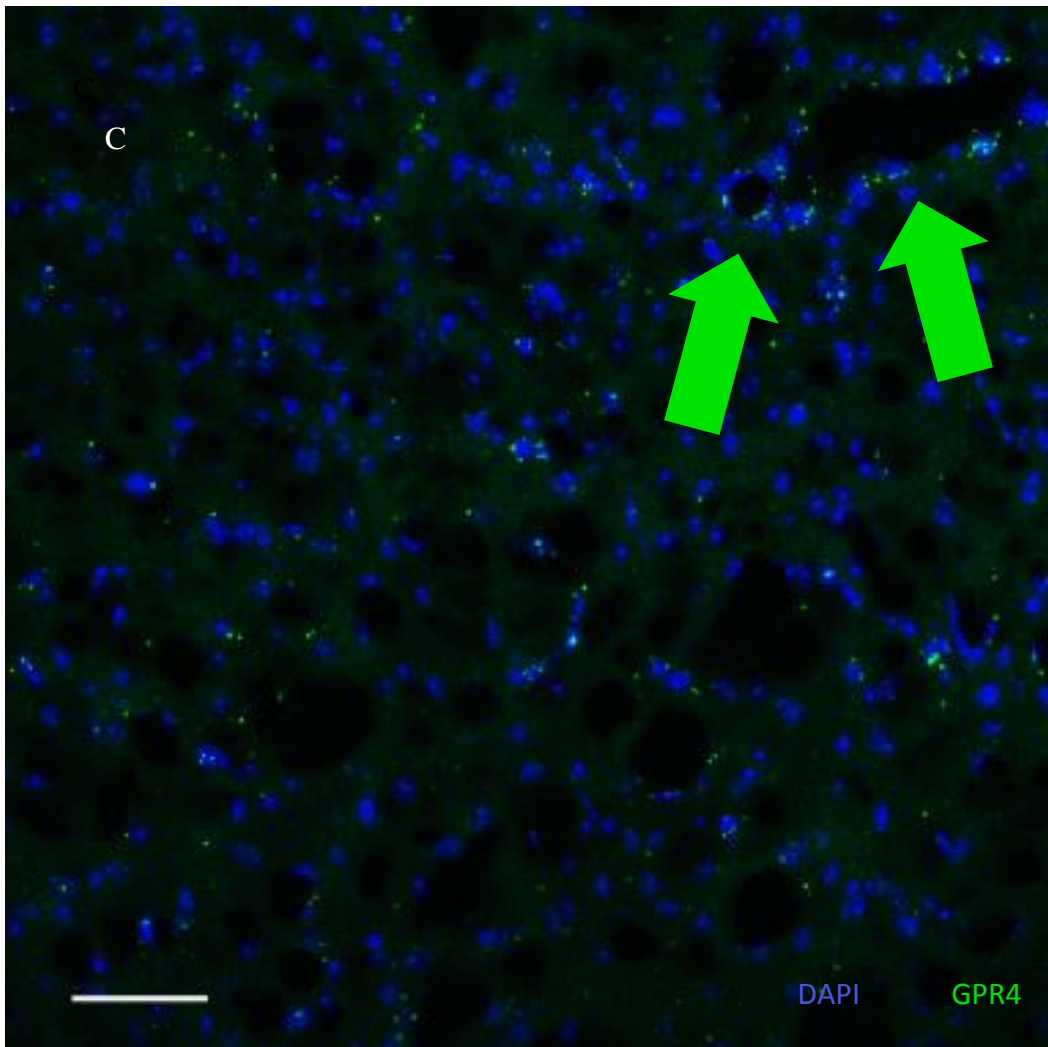

Supplement: mmc1.pdf [file mmc1.pdf]
